# Supplementary material for: Highly efficient metal(iii) porphyrin and salen complexes for the polymerization of rac-lactide under ambient conditions
Source: Royal Society of Chemistry journal article supplement (doi:10.1039/c8dt04699a), 2019-01-01
Supplement: c8dt04699a1.pdf [file c8dt04699a1.pdf]

Electronic Supplementary Information for

**Highly Efficient Metal(III) Porphyrin and Salen Complexes for the  
Polymerization of *rac*-Lactide at Ambient Conditions**

Siriwan Praban,<sup>a</sup> Parichat Piromjitpong,<sup>a</sup> Vagulejan Balasanthiran,<sup>b</sup>  
Savithra Jayaraj,<sup>c</sup> Malcolm H. Chisholm,<sup>c</sup> Jonggol Tantirungrotechai,<sup>a</sup>  
and Khamphree Phomphrai<sup>\*d,e</sup>

<sup>a</sup> Center for Catalysis, Department of Chemistry and Center of Excellence for Innovation in Chemistry, Faculty of Science, Mahidol University, Rama 6 Road, Bangkok 10400, Thailand

<sup>b</sup> Monomer-Polymer and Dajac Labs, 340 Mathers Road, Bldg 35, Ambler, PA 19002, United States

<sup>c</sup> Center for Catalysis, Department of Chemistry and Biochemistry, The Ohio State University, 100 W. 18<sup>th</sup> Avenue, Columbus, Ohio, 43210, United States

<sup>d</sup> Department of Materials Science and Engineering, School of Molecular Science and Engineering, Vidyasirimedhi Institute of Science and Technology, Wangchan, Rayong 21210 Thailand; E-mail: khamphree.p@vistec.ac.th

<sup>e</sup> Research Network of NANOTEC-VISTEC on Nanotechnology for Energy, Vidyasirimedhi Institute of Science and Technology, Wangchan, Rayong 21210 Thailand

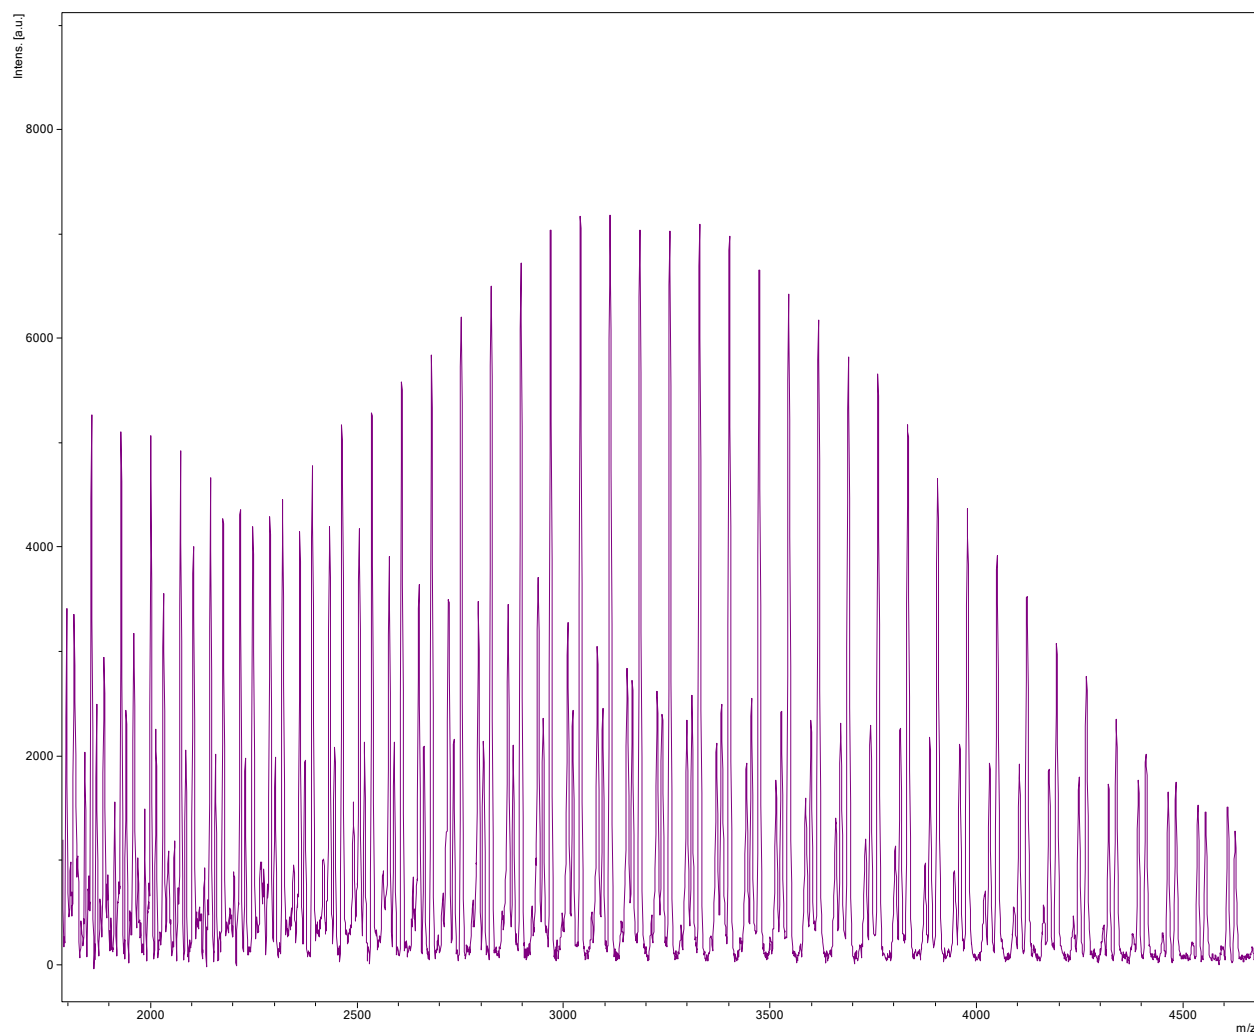

**Fig. S1** MALDI spectrum of polylactide obtained from the reaction of *rac*-LA catalyzed by TPPAICl/PPN<sup>+</sup>Cl<sup>-</sup> (*rac*-LA: TPPAICl: PPN<sup>+</sup>Cl<sup>-</sup> = 100: 1: 1) in CHO at room temperature. [Major polylactide pattern is H(LA/2)<sub>n</sub>(CHO)Cl + Na<sup>+</sup> and minor series are (LA/2)<sub>n</sub>(CHO)<sub>2</sub> + H<sup>+</sup> and H(LA/2)<sub>n</sub>(CHO)OH + Na<sup>+</sup>.

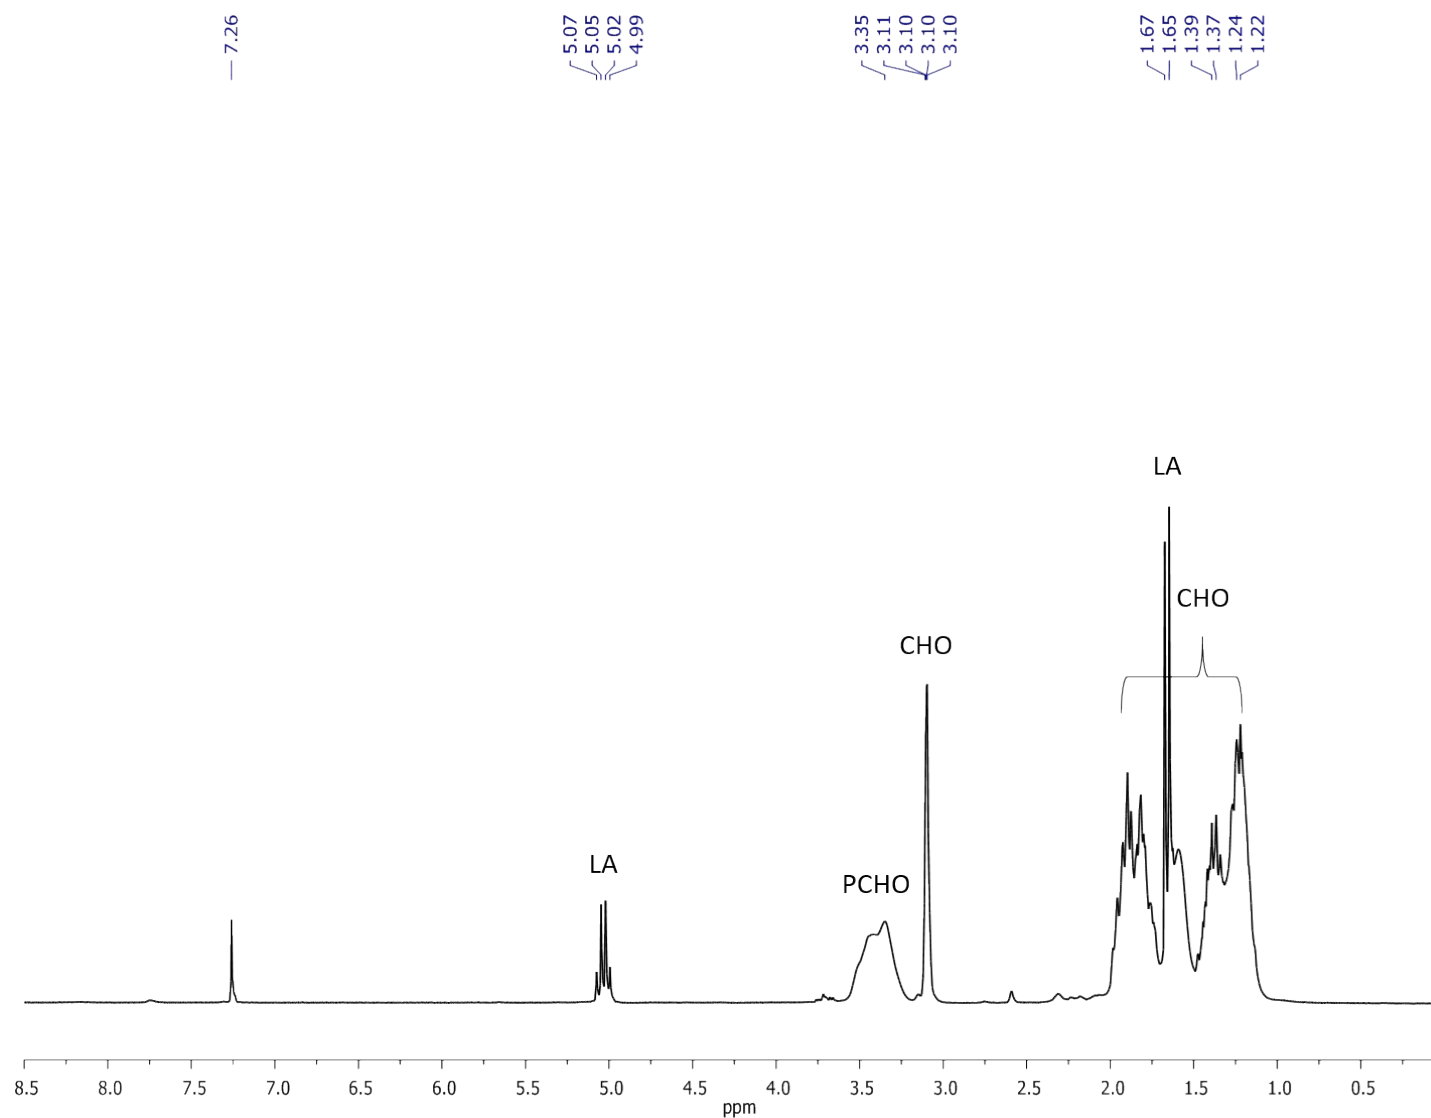

**Fig. S2**  $^1\text{H}$  NMR spectrum of polycyclohexene oxide (PCHO) obtained from polymerization of *rac*-LA in an absence of an initiator using ratio of *rac*-LA: TPPAICI = 100: 1 in CHO at room temperature (400 MHz,  $\text{CDCl}_3$ , 30  $^\circ\text{C}$ )

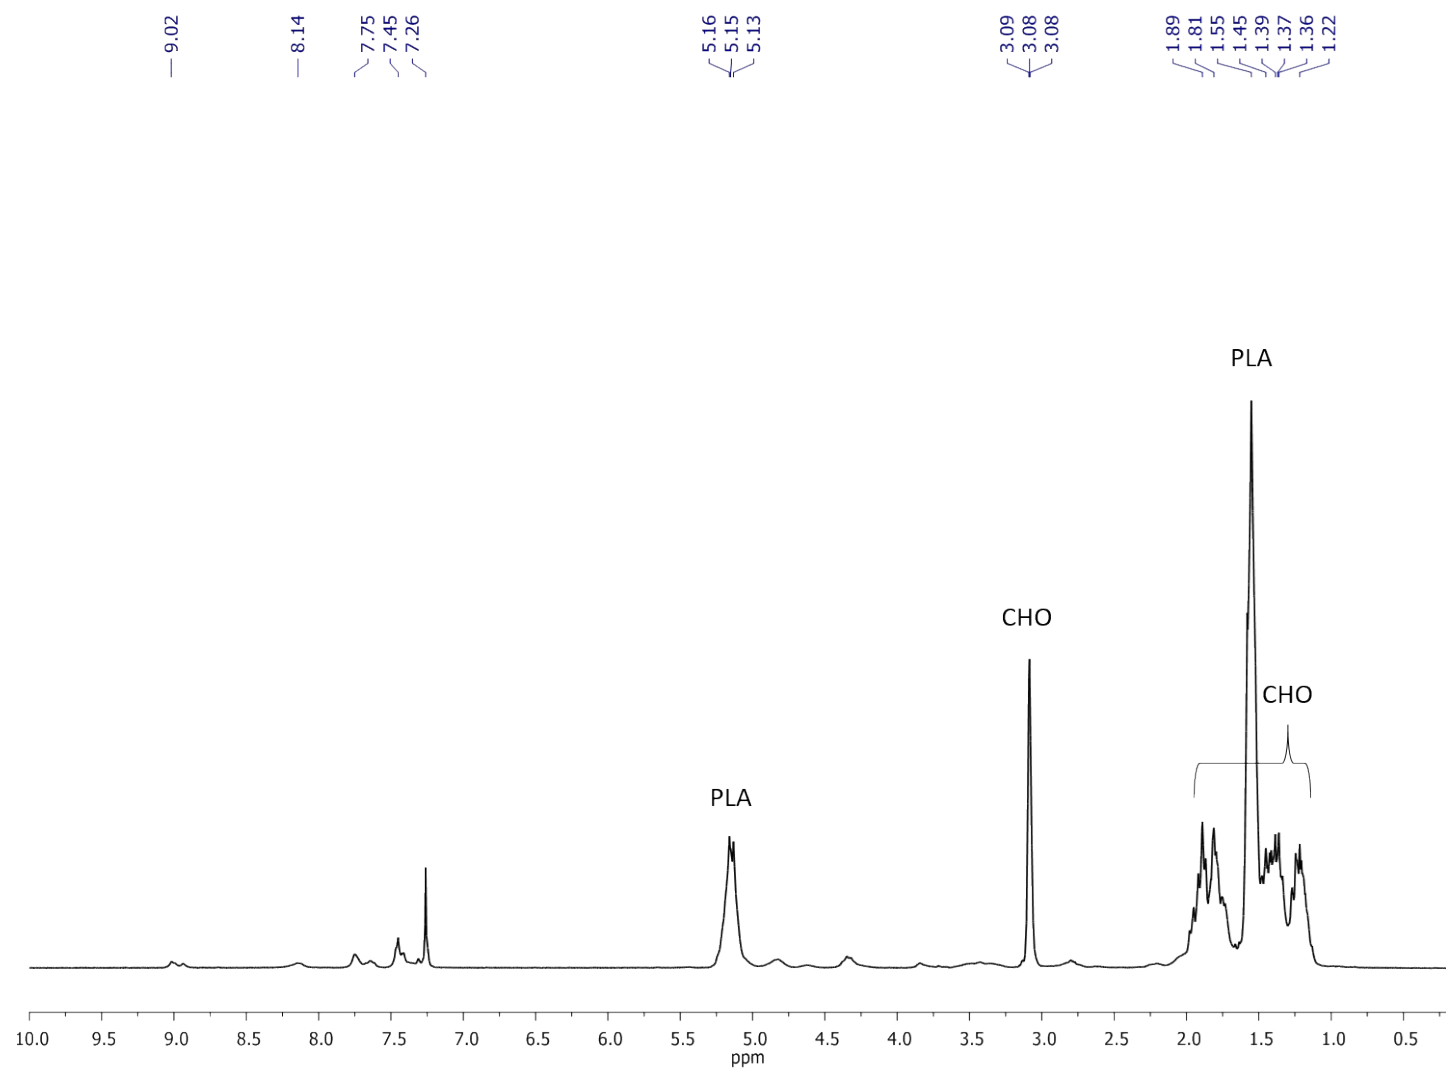

**Fig. S3**  $^1\text{H}$  NMR spectrum of poly(*rac*-LA) obtained from polymerization of *rac*-LA using ratio of *rac*-LA: TPPAICl:  $\text{PPN}^+\text{Cl}^-$  = 100: 1: 1 in CHO at room temperature (400 MHz,  $\text{CDCl}_3$ , 30 °C)

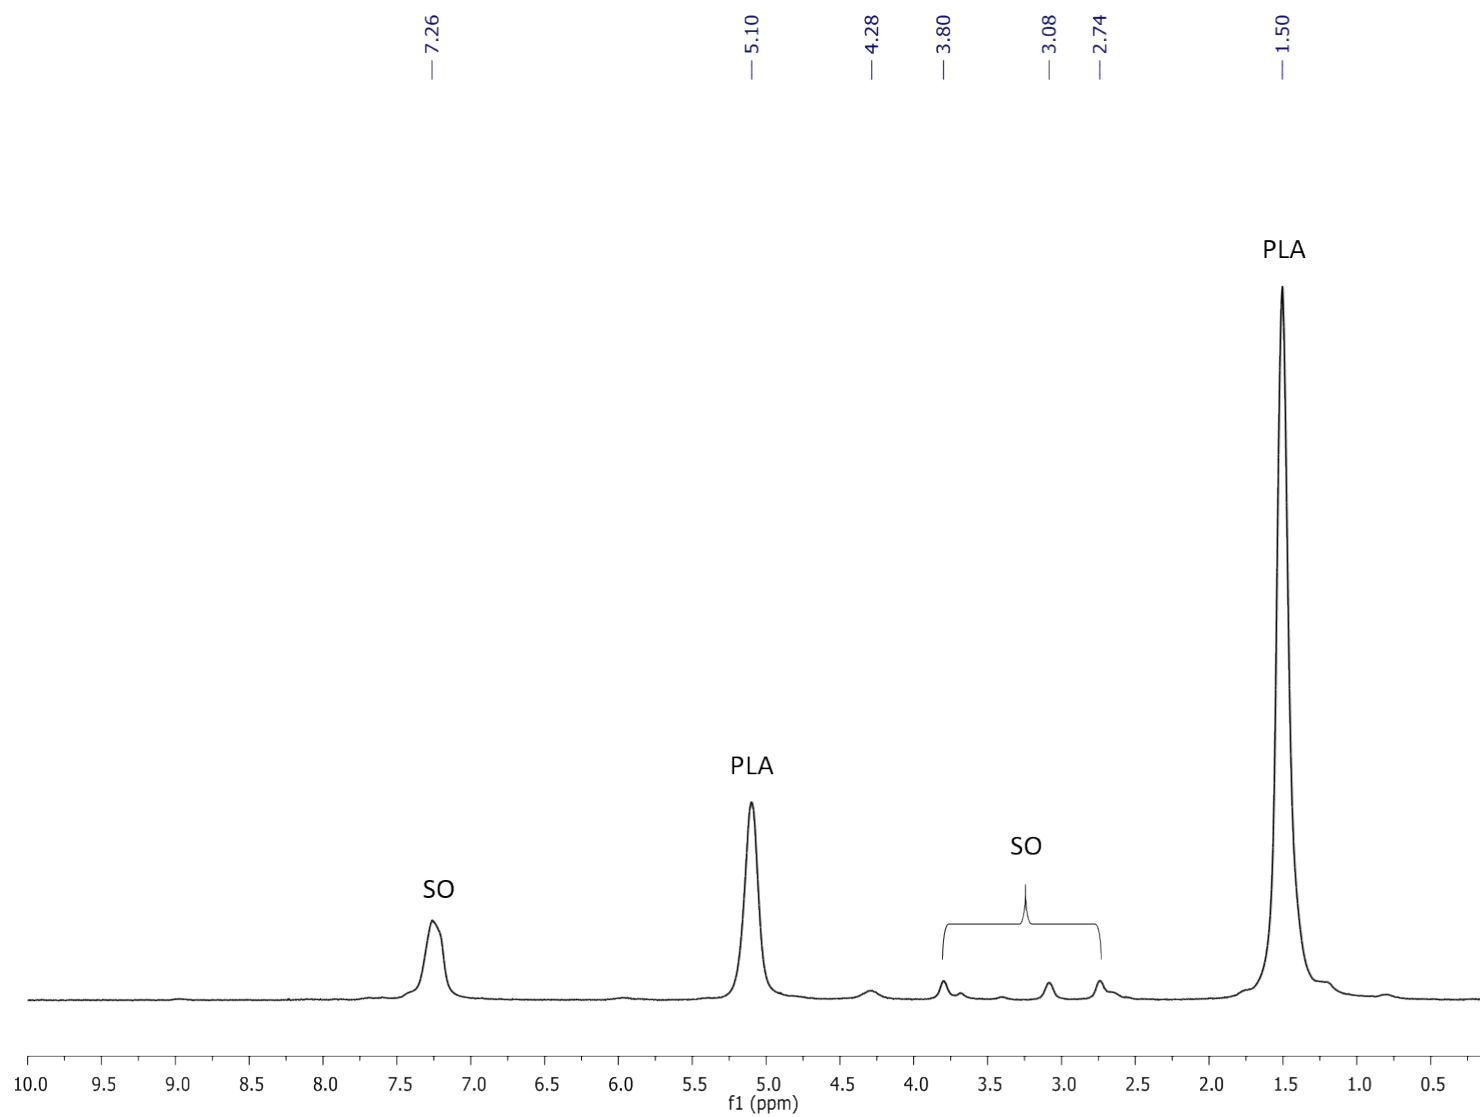

**Fig. S4**  $^1\text{H}$  NMR spectrum of poly(*rac*-LA) obtained from polymerization of *rac*-LA using ratio of *rac*-LA: TPPAICl: PPN $^+\text{Cl}^-$  = 100: 1: 1 in *rac*-styrene oxide (SO) at 100  $^\circ\text{C}$  (400 MHz,  $\text{CDCl}_3$ , 30  $^\circ\text{C}$ )

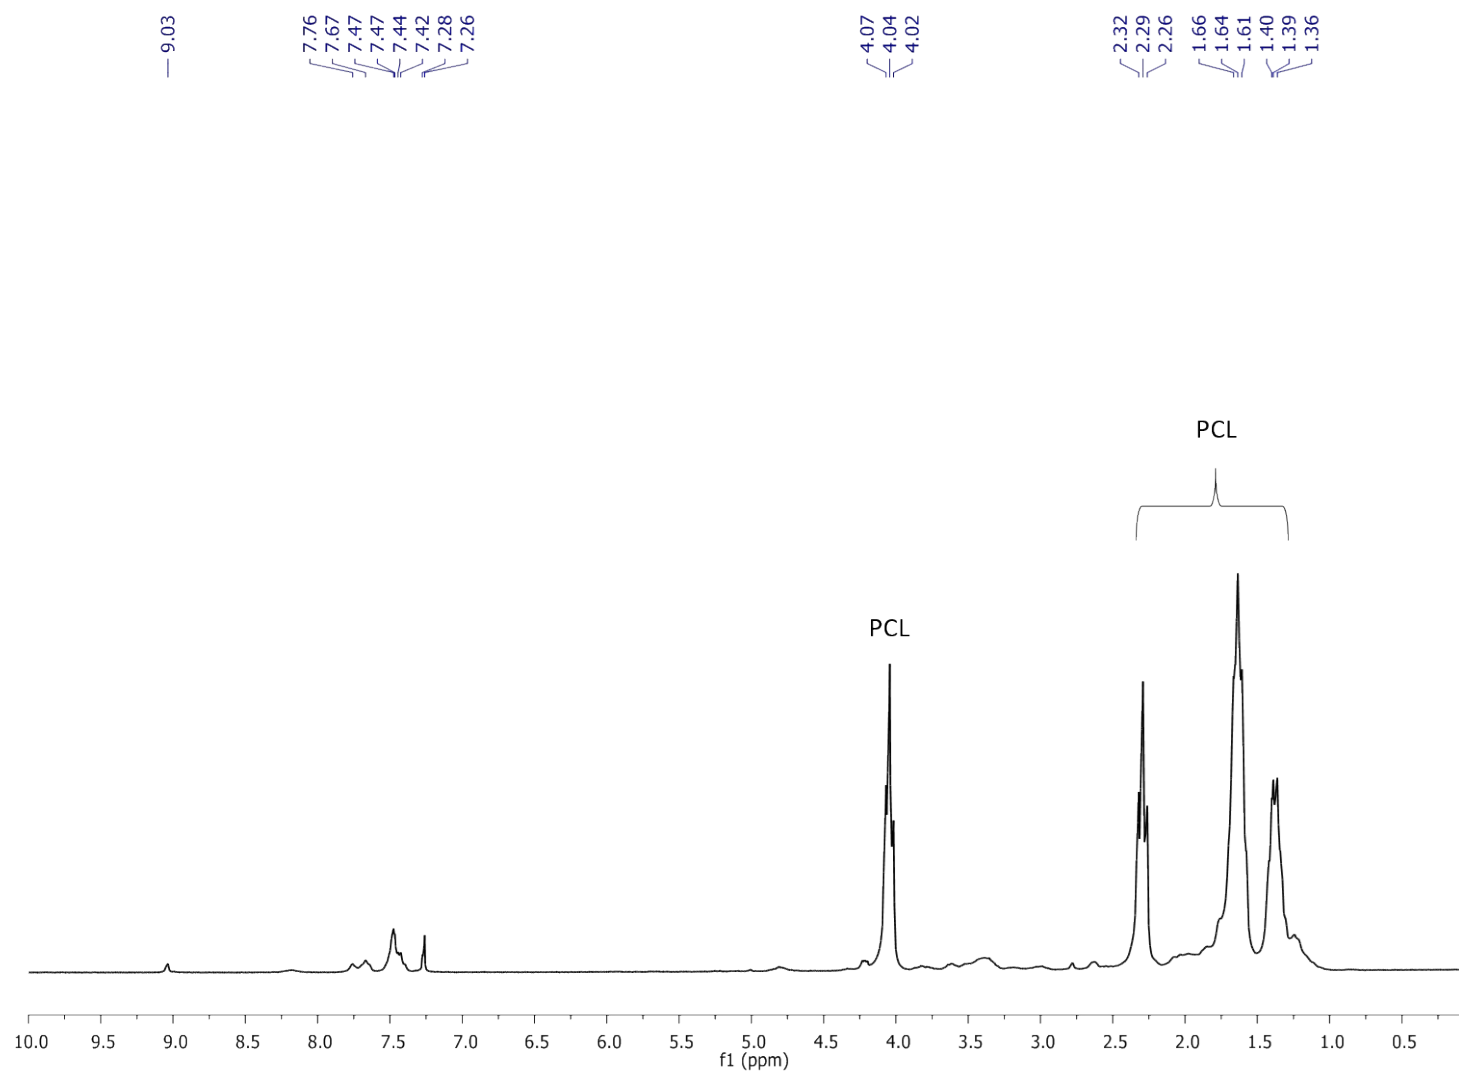

**Fig. S5**  $^1\text{H}$  NMR spectrum of poly( $\epsilon$ -CL) obtained from polymerization of  $\epsilon$ -CL using ratio of  $\epsilon$ -CL: TPPAlCl:  $\text{PPN}^+\text{Cl}^- = 100: 1: 1$  in CHO at 100 °C (400 MHz,  $\text{CDCl}_3$ , 30 °C)
